# Supplementary material for: Nationwide Screening for Bee Viruses in Apis mellifera Colonies in Egypt
Source: Insects. 2023 Feb 9;14(2):172. doi: 10.3390/insects14020172 (PMC9964814; doi:10.3390/insects14020172)
Supplement: Supplementary file 1 [file insects-14-00172-s001.zip › Supplementry materials_tables_RJP.xlsx]

## Sheet: S1_Primers used
Table S1. Primers used for quantification of viruses by reverse transcription followed by qPCR and their efficiency
Viral Target	Primer Name	Sequence 5’-3’	Efficiency	Reference
BQCV	BQCV-qF7893	5′-AGTGGCGGAGATGTATGC-3′	1.033	[71]
	BQCV-qB8150	5′-GGAGGTGAAGTGGCTATATC-3′
CBPV	CBPV1-qF1818	5′-CAACCTGCCTCAACACAG-3′	0.902	[71]
	CBPV1-qB2077	5′-AATCTGGCAAGGTTGACTGG-3′
SBV	SBV-qF3164	5′-TTGGAACTACGCATTCTCTG-3′	0.921	[71]
	SBV-qB3461	5′-GCTCTAACCTCGCATCAAC-3′
KBV	KBV-F6639	5′-CCATACCTGCTGATAACC-3′		[71]
	KIABPV-R6707	5′-CTGAATAATACTGTGCGTATC-3′
IAPV	IAPV-F6627	5′-CCATGCCTGGCGATTCAC-3′		[71]
	KIABPV-R6707	5′-CTGAATAATACTGTGCGTATC-3′
DWV-A	DWV-F8668	5′-TTCATTAAAGCCACCTGGAACATC-3′	0.856	[72]
	DWV-B8757	5′-TTTCCTCATTAACTGTGTCGTTGA-3′
DWV-B	VDVq-F2	5′-TAT CTT CAT TAA AAC CGCCAGGCT 3′	0.86	[72]
	VDVq-R2a	5′-CTT CCT CAT TAA CTG AGT TGT TGTC-3′
ABPV	KIABPV-F6648	5′-CCTTTCATGATGTGGAAAC-3′		[72]
	KIABPV-B6707	5′-CTGAATAATACTGTGCGTATC-3′
SBPV	SBPV-F3177	5′-GCGCTTTAGTTCAATTGCC-3′	0.938	[73]
	SBPV-B3363	5′-ATTATAGGACGTGAAAATATAC-3′
EBV	EBV-F-HS	5′-TACAAGTGCAGGTTTTCCGTT-3′		[30]
	EBV-R-HS	5′-CTCATTAACTGCGTAGTTGAC-3′
β-actin (host reference)	AMActin - F:	5′-ATGCCAACACTGTCCTTTCTGG-3′	1.01	[27]
(host reference)	AMActin - R:	5′-GACCCACCAATCCATACGGA-3′
References
71	Locke, B.; Conte, Y. Le; Crauser, D.; Fries, I. Host Adaptations Reduce the Reproductive Success of Varroa Destructor in Two Distinct European Honey Bee Populations. Ecol. Evol. 2012, 2 (6), 1144–1150. https://doi.org/10.1002/ece3.248.
72	Mondet, F.; de Miranda, J. R.; Kretzschmar, A.; Le Conte, Y.; Mercer, A. R. On the Front Line: Quantitative Virus Dynamics in Honeybee (Apis Mellifera L.) Colonies along a New Expansion Front of the Parasite Varroa Destructor. PLoS Pathog. 2014, 10 (8), e1004323. https://doi.org/10.1371/journal.ppat.1004323.
73	McMahon, D. P.; Fürst, M. A.; Caspar, J.; Theodorou, P.; Brown, M. J. F.; Paxton, R. J. A Sting in the Spit: Widespread Cross-Infection of Multiple RNA Viruses across Wild and Managed Bees. J. Anim. Ecol. 2015, 84 (3), 615–624. https://doi.org/10.1111/1365-2656.12345.
27	Forsgren, E.; de Miranda, J. R.; Isaksson, M.; Wei, S.; Fries, I. Deformed Wing Virus Associated with Tropilaelaps Mercedesae Infesting European Honey Bees (Apis Mellifera). Exp. Appl. Acarol. 2009, 47 (2), 87–97. https://doi.org/10.1007/s10493-008-9204-4.
30	de Miranda, J. R.; Brettell, L. E.; Chejanovsky, N.; Childers, A. K.; Dalmon, A.; Deboutte, W.; de Graaf, D. C.; Doublet, V.; Gebremedhn, H.; Genersch, E.; Gisder, S.; Granberg, F.; Haddad, N. J.; Kaden, R.; Manley, R.; Matthijnssens, J.; Meeus, I.; Migdadi, H.; Milbrath, M. O.; Mondet, F.; Remnant, E. J.; Roberts, J. M. K.; Ryabov, E. V.; Sela, N.; Smagghe, G.; Somanathan, H.; Wilfert, L.; Wrigh…

## Sheet: S2_Viral infection_winter2021
Table S2. Rate of infestation by varroa mites (per 100 worker bees) and presence of viruses in 54 apiaries spread across 18 governorates in Egypt during the winter of 2021.
Governorate	Apiary location	Sample	ABPV	BQCV	CBPV	DWV-A	DWV-B	DWV-D (EBV)	IAPV	KBV	SBV	SBPV	varroa/100 bees
	Abees	M1	-	+	+	-	-	-	-	-	-	-	0
Alexandria	Borg Elarab	M2	-	-	-	+	-	-	-	-	-	+	5
	Sidi-krir	M3	+	-	-	-	-	-	-	+	-	+	4
	Elhamoul	M4	-	-	-	+	-	-	-	-	-	-	1
Kafr Elsheikh	Biala	M5	-	+	-	+	-	-	-	-	-	-	6
	Qallin+ University	M6	-	+	-	+	-	-	-	-	-	-	7
	El Senbellawein	M7	+	+	-	+	-	-	-	-	-	+	2
Dakahlia	Bilqas	M8	+	+	-	-	-	-	-	-	-	-	6
	Manzala	M9	+	+	-	-	-	-	-	-	-	-	5
	Elmahalla	M10	+	+	-	+	-	-	-	+	-	-	2
Kharbia	Kafr Elzayat	M11	-	+	-	+	-	-	-	-	-	-	8
	Hessat Shabshir	M12	+	+	-	+	-	-	-	-	-	-	3
	Beside Banha (Amr)	M13	-	+	-	+	-	-	-	-	-	+	7
Cairo & Giza	Dessert Rood	M14	-	+	-	-	-	-	-	-	-	+	0
	Cairo University	M15	+	+	-	+	-	-	-	+	-	-	6
	Belbes	M16	-	-	-	+	-	-	-	+	-	+	2
Sharkia	Minia Elqamh	M17	-	+	-	+	-	-	-	-	-	-	4
	Zagazig	M18	-	+	+	+	-	-	-	-	-	+	1
	Rasheed	M19	-	-	-	+	-	-	-	-	-	+	2
Bahiera	Edco	M20	-	-	-	+	-	-	-	-	-	+	8
	Kom Hamada	M21	-	-	-	+	-	-	-	-	-	-	8
	Elbagour	M22	+	+	-	+	-	-	-	-	-	-	3
Menofia	Almenofia-University	M23	+	-	-	+	-	-	-	-	-	+	3
	Shbeen Alkoom	M24	-	+	-	+	-	-	-	-	-	-	8
	Senoruis	M25	-	+	-	+	-	-	-	-	-	-	9	The highest rates of varroa mite infestation (mites per 100 bees)
Faiyum	AlFayoum-University	M26	-	-	-	+	-	-	-	-	-	-	8
	Ibsheway	M27	-	+	-	+	-	-	-	-	-	+	5
	Alminia-University	M28	-	+	-	+	-	-	-	-	-	-	7
Minia	Maghagha	M29	-	+	-	+	-	-	-	-	-	-	8
	Samalout	M30	-	-	-	+	-	-	-	-	-	-	3
	Tanaghah	M31	-	-	-	-	-	-	-	-	-	-	0
Asyut	Asuit-University	M32	-	-	-	+	-	-	-	-	-	-	0
	Abu Tij	M33	+	+	-	+	-	-	-	-	-	-	1
	Al Qarnah	M34	+	-	+	+	-	-	-	-	-	-	6
Luxor	Luxur	M35	+	-	+	+	-	-	-	-	-	-	3
	Esna	M36	-	-	+	+	-	-	-	-	-	+	5
	El Hamam	M37	-	+	-	-	-	-	-	-	-	-	0
Matrouh	Elsahel ELshamaly	M38	-	-	-	-	-	-	-	-	-	+	6
	Al Alameen	M39	-	-	-	+	-	-	-	-	-	-	8
	Dishna	M40	+	+	-	+	-	-	-	-	-	-	8
Kina	Qus	M41	-	-	+	-	-	-	-	-	-	-	0
	Kina	M42	+	-	+	+	-	-	-	-	-	-	3
	El Balyana	M43	+	-	-	+	-	-	-	-	-	-	5
Sohag	Girga	M44	+	+	-	+	-	-	-	-	-	-	2
	Dar Elsalam	M45	+	+	-	+	-	-	-	-	-	+	3
	1	M46	-	+	-	+	-	-	-	-	-	+	2
Esmaeilia	2	M47	-	+	-	+	-	-	-	-	-	-	6
	3	M48	-	+	-	+	-	-	-	-	-	-	8
	1	M49	+	+	-	+	-	-	-	-	-	-	1
Sini	2	M50	+	+	-	-	-	-	-	-	-	-	1
	3	M51	-	+	-	+	-	-	-	-	-	-	1
	Al Farafra 1	M52	+	+	-	+	-	-	-	-	-	+	1
New Valley	Al Farafra 2	M53	-	+	-	+	-	-	-	-	-	-	1
	Kharga	M54	-	+	-	-	-	-	-	-	-	-	0

## Sheet: S3_Viral infection_Summer 2021
Table S3. Rate of infestation by varroa mites (per 100 worker bees) and presence of viruses in 54 apiaries spread across 18 governorates in Egypt during the summer of 2021
Governorate	Apiary location	Sample	ABPV	BQCV	CBPV	DWV-A	DWV-B	DWV-D (EBV)	IAPV	KBV	SBPV	SBV	varroa/100 bees
	Abees	M1	+	-	-	+	-	-	-	-	-	-	5
Alexandria	Borg Elarab	M2	+	-	-	+	-	-	-	-	-	-	9
	Sidi-krir	M3	+	+	-	+	-	-	-	-	-	+	10
	Elhamoul	M4	+	-	-	+	-	-	-	-	-	-	1
Kafr Elsheikh	Biala	M5	-	+	-	+	-	-	-	-	-	-	8
	Qallin+ University	M6	-	+	-	+	-	-	-	-	-	-	8
	El Senbellawein	M7	+	-	+	+	-	-	-	+	-	-	1
Dakahlia	Bilqas	M8	+	+	+	+	-	-	-	-	-	-	6
	Manzala	M9	+	+	-	-	-	-	-	-	-	-	2
	Elmahalla	M10	-	+	-	+	-	-	-	-	-	-	1
Kharbia	Kafr Elzayat	M11	-	-	+	+	-	-	-	-	-	-	11
	Hessat Shabshir	M12	+	+	-	-	-	-	+	-	-	-	3
	Beside Banha (Amr)	M13	-	-	-	+	-	-	-	-	-	+	9
Cairo & Giza	Dessert Rood	M14	-	+	-	+	-	-	-	-	-	-	4
	Cairo University	M15	-	+	-	+	-	-	+	-	-	-	5
	Belbes	M16	-	+	-	-	-	-	+	-	-	-	0
Sharkia	Minia Elqamh	M17	-	+	-	-	-	-	+	-	-	-	0
	Zagazig	M18	-	+	-	-	-	-	-	-	-	-	0
	Rasheed	M19	+	+	-	+	-	-	-	-	-	+	9
Bahiera	Edco	M20	+	-	-	+	-	-	-	-	-	-	11
	Kom Hamada	M21	+	+	-	+	-	-	-	-	-	-	9
	Elbagour	M22	-	-	-	-	-	-	-	-	-	-	0
Menofia	Almenofia-University	M23	+	+	-	+	-	-	-	-	-	-	2
	Shbeen Alkoom	M24	+	-	-	+	-	-	-	-	-	-	11
	Senoruis	M25	-	+	-	+	-	-	-	-	-	-	14
Faiyum	AlFayoum-University	M26	-	+	-	-	-	-	-	-	-	+	0
	Ibsheway	M27	-	+	-	-	-	-	+	-	-	-	0
	Alminia-University	M28	-	+	-	+	-	-	-	-	-	-	12
Minia	Maghagha	M29	-	+	-	+	-	-	+	-	-	-	11
	Samalout	M30	-	+	-	+	-	-	-	-	-	-	14	The highest rates of varroa mite infestation (mites per 100 bees)
	Tanaghah	M31	-	+	-	+	-	-	-	-	-	-	2
Asyut	Asuit-University	M32	-	-	-	+	-	-	-	-	-	-	6
	Abu Tij	M33	-	-	-	+	-	-	-	-	-	-	8
	Al Qarnah	M34	-	+	-	+	-	-	-	-	-	-	3
Luxor	Luxur	M35	+	+	-	-	-	-	-	-	-	-	1
	Esna	M36	-	-	-	-	-	-	-	-	-	-	0
	El Hamam	M37	+	-	-	+	-	-	+	-	-	-	1
Matrouh	Elsahel ELshamaly	M38	+	+	-	+	-	-	-	-	-	-	2
	Al Alameen	M39	+	-	-	+	-	-	-	-	-	-	2
	Dishna	M40	-	+	-	+	-	-	-	-	-	-	9
Kina	Qus	M41	-	+	-	+	-	-	-	-	-	-	5
	Kina	M42	+	+	-	+	-	-	-	-	-	-	3
	El Balyana	M43	+	+	-	+	-	-	-	-	-	-	7
Sohag	Girga	M44	+	+	-	-	-	-	+	-	-	-	3
	Dar Elsalam	M45	-	+	+	+	-	-	-	-	-	-	6
	1	M46	+	+	+	+	-	-	-	-	-	-	6
Esmaeilia	2	M47	-	+	-	+	-	-	-	-	-	-	2
	3	M48	-	+	-	+	-	-	-	-	-	-	3
	1	M49	-	-	-	+	-	-	-	-	-	-	4
Sini	2	M50	-	+	-	+	-	-	-	-	-	-	5
	3	M51	-	+	-	+	-	-	-	-	-	-	4
	Al Farafra 1	M52	+	-	-	-	-	-	-	-	-	-	2
New Valley	Al Farafra 2	M53	+	+	-	-	-	-	-	-	-	+	1
	Kharga	M54	+	-	-	-	-	-	+	-	-	-	4

## Sheet: S4_Frequencies of viral co-occu
Table S4. Frequencies of viral co-occurrence in honey bee samples collected from 54 apiaries across 18 governorates in Egypt during winter and summer 2021
No. of	Viral co-occurrence		No. of apiaries		Percentage (%)
Viruses	Winter	Summer	Winter	Summer	Winter	Summer
1	DWV-A	DWV-A	6	3	11.11	5.56
	BQCV	BQCV	2	2	3.7	3.7
	SBPV	-	1	-	1.85	-
	CBPV	-	1	-	1.85	-
	DWV-A, BQCV	DWV-A, BQCV	27	27	50	50
2	DWV-A, ABPV	DWV-A, ABPV	16	17	29.63	31.48
	DWV-A, CBPV	DWV-A, CBPV	5	5	9.25	9.25
	DWV-A, SBPV	BQCV, IAPV	13	7	24.07	12.96
	-	ABPV, IAPV	-	4	-	7.4
	DWV-A, BQCV, ABPV	DWV-A, BQCV, ABPV	11	9	20.37	16.67
3	-	DWV-A, BQCV, IAPV	-	2	-	3.7
	-	ABPV, BQCV, IAPV	-	2	-	3.7
4	DWV-A, BQCV, ABPV, SBPV	DWV-A, BQCV, ABPV, SBV	3	2	11.11	3.7
	DWV-A, BQCV, ABPV, KBV	-	2	-	3.7	-
	DWV-A, BQCV, SBPV, CBPV	-	1	-	1.85	-
